# Supplementary material for: A phase 1b clinical trial evaluating sifalimumab, an anti-IFN-α monoclonal antibody, shows target neutralisation of a type I IFN signature in blood of dermatomyositis and polymyositis patients
Source: HighWire-hosted journal article supplement (doi:10.1136/annrheumdis-2012-202794), 2013-02-24

Figure S1

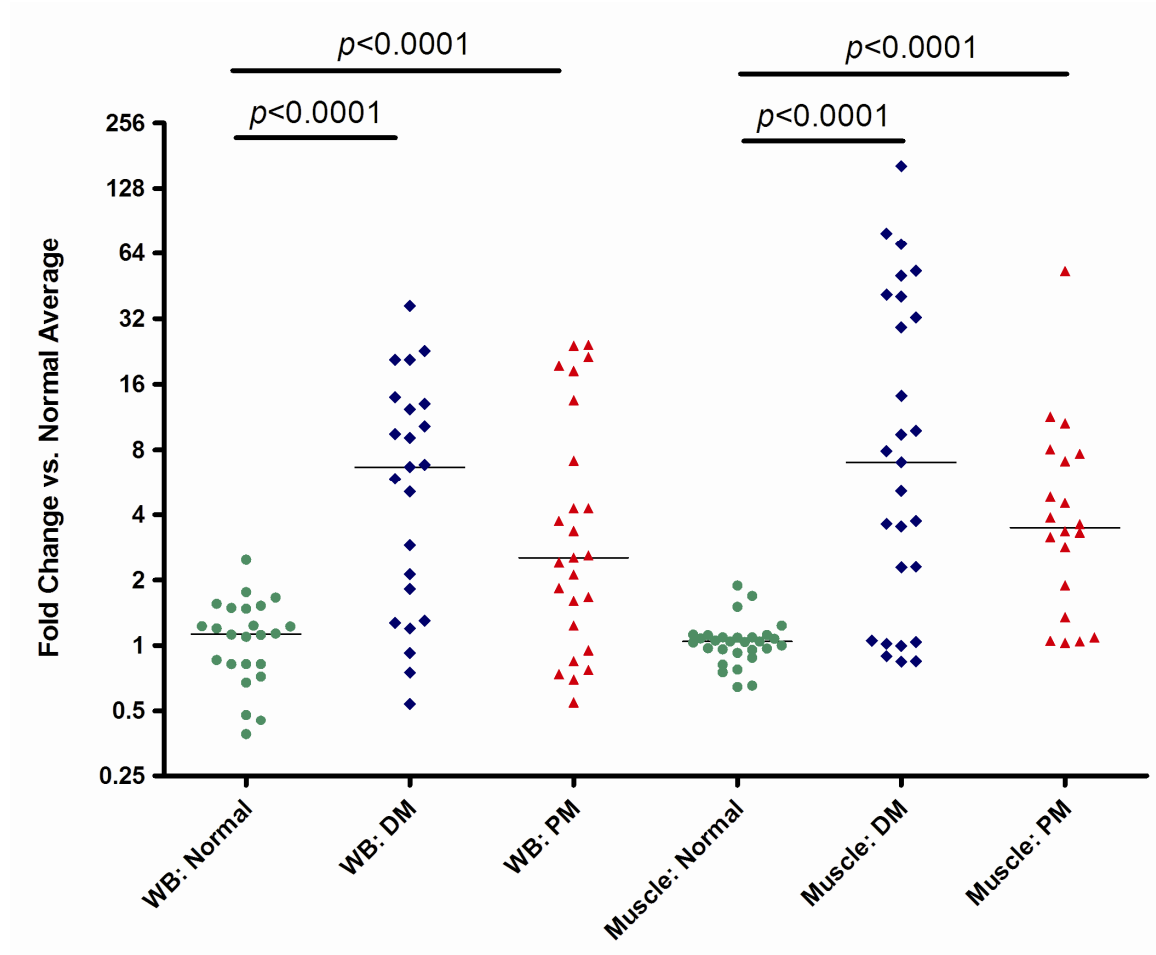

Figure S2

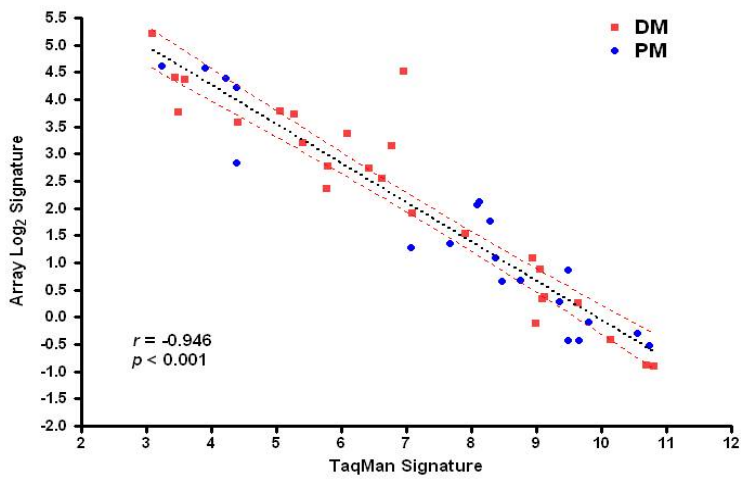

Figure S3

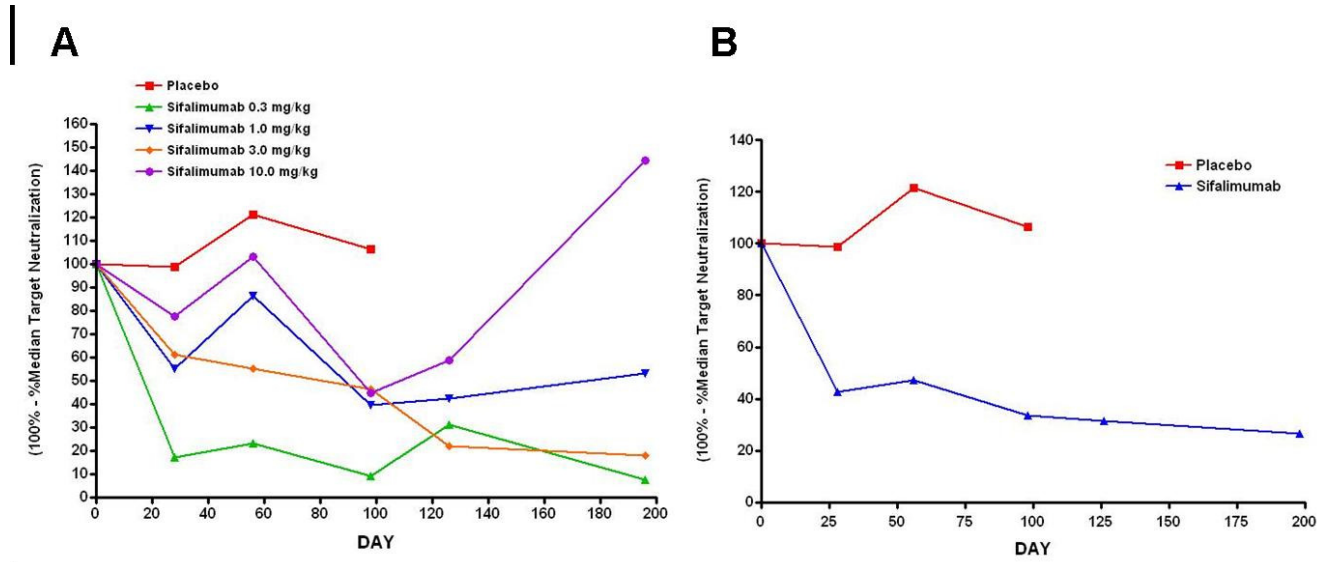

Figure S4

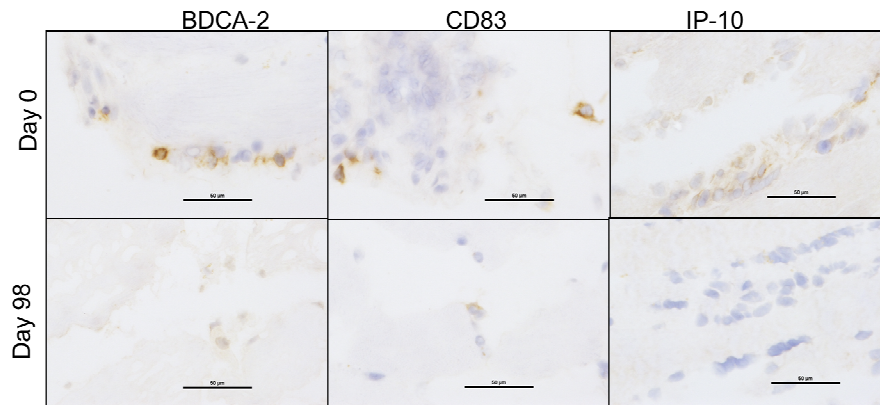

Figure S5

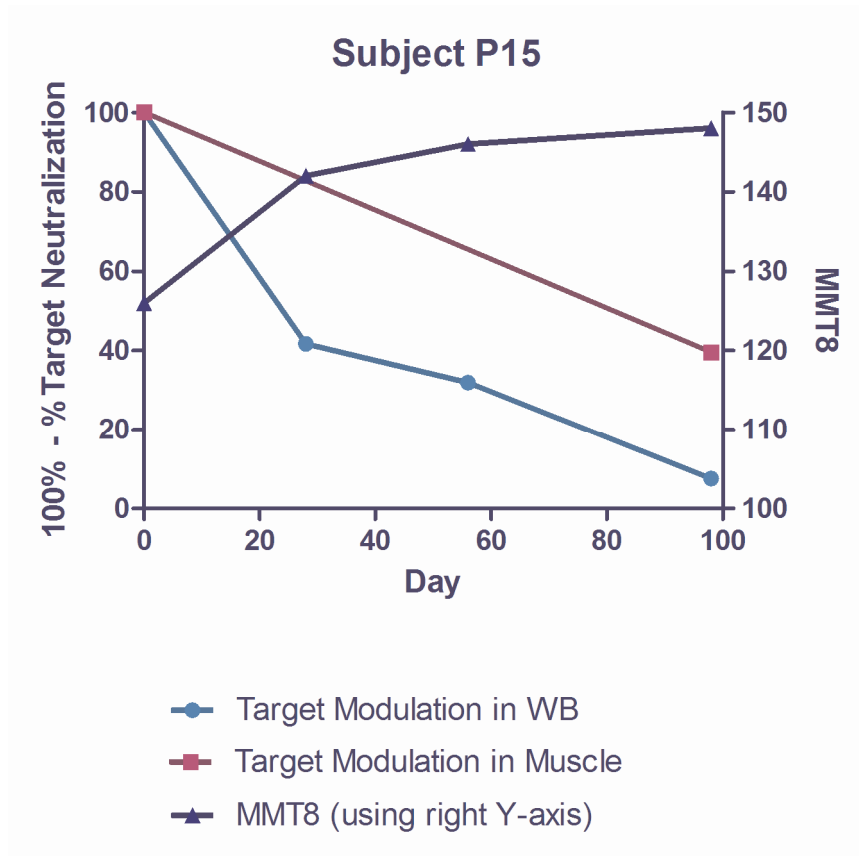

Figure S6

Antigen Presentation Pathway

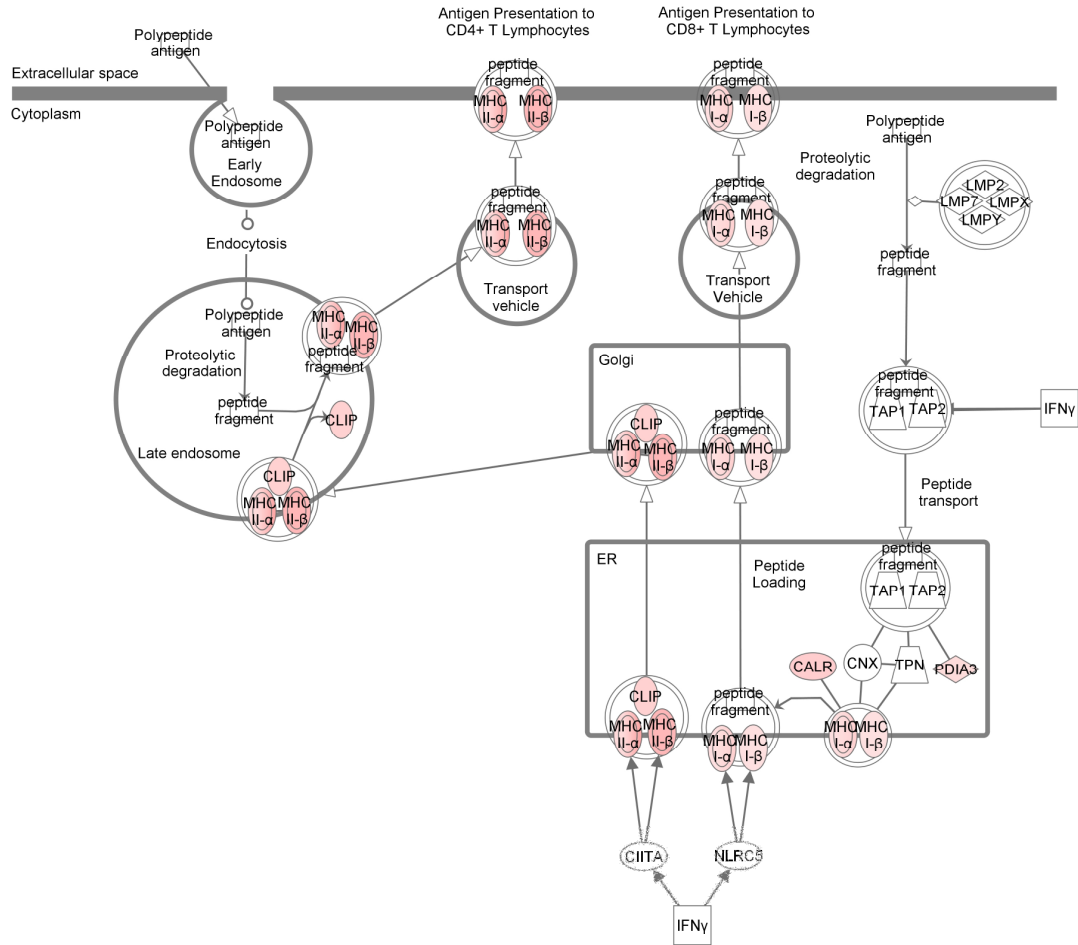

Leukocyte Extravasation Signaling

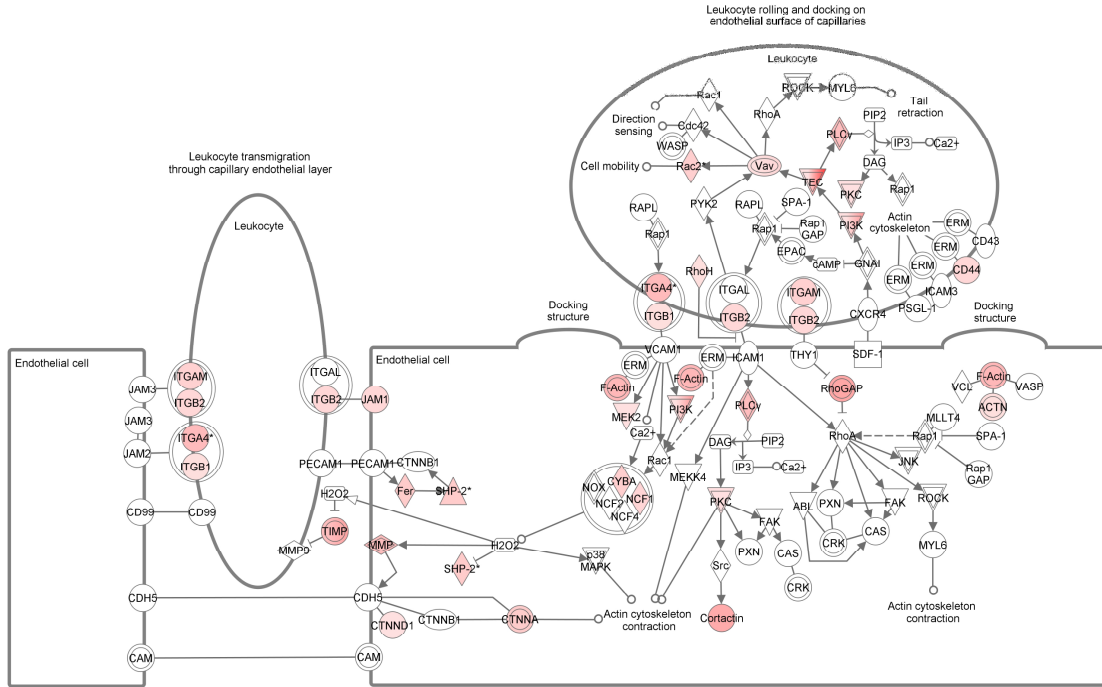

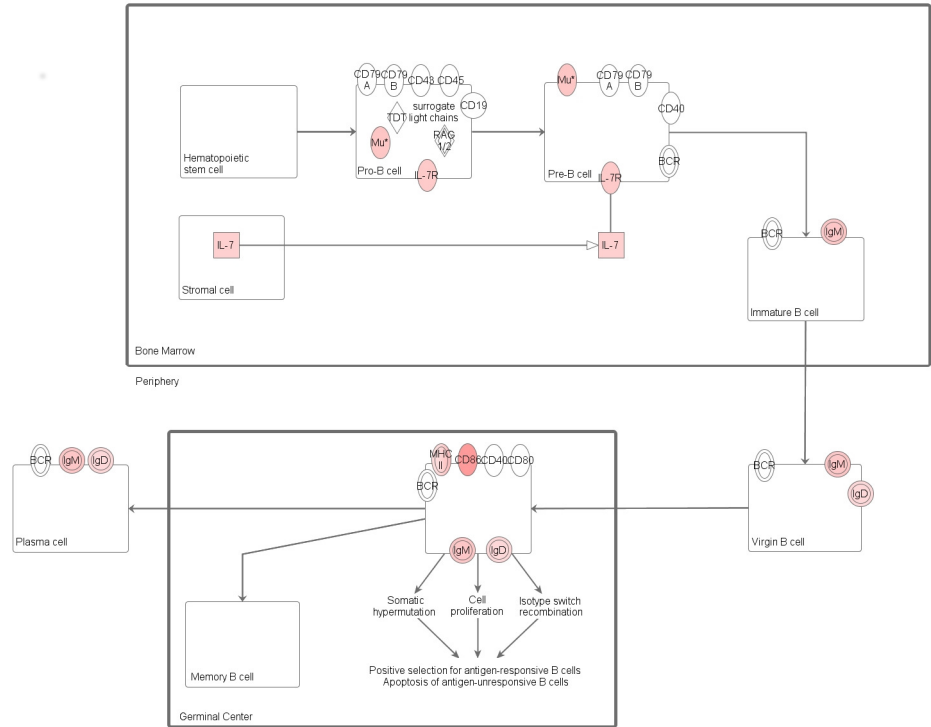

Supplement: annrheumdis-2012-202794supp_figs.pdf [file annrheumdis-2012-202794supp_figs.pdf]
